# Supplementary material for: Sepsis Related Mortality Associated with an Inflammatory Burst in Patients Admitting to the Department of Internal Medicine with Apparently Normal C-Reactive Protein Concentration
Source: MDPI journal article supplement (doi:10.3390/jcm11113151), 2022-06-01
Supplement: s1 [file s1]

Supplementary Table S1. Cause of death by quartiles of 1st and 2nd CRP measurements.

| Quartile of 1st CRP test | Cause of death              | n   |
|--------------------------|-----------------------------|-----|
| 1                        | cardiogenic shock           | 1   |
|                          | Intracranial hemorrhage     | 8   |
|                          | Ischemic stroke             | 2   |
|                          | sepsis                      | 1   |
|                          | sudden cardiac arrest       | 2   |
|                          | unknown                     | 1   |
| 2                        | advanced metastatic disease | 1   |
|                          | anoxic brain damage         | 1   |
|                          | cardiogenic shock           | 2   |
|                          | Intracranial hemorrhage     | 10  |
|                          | multiple organ failure      | 3   |
|                          | Respiratory failure         | 5   |
|                          | sepsis                      | 6   |
|                          | status epilepticus          | 1   |
|                          | sudden cardiac arrest       | 3   |
|                          | unknown                     | 1   |
| 3                        | cardiogenic shock           | 1   |
|                          | CHF exacerbation            | 2   |
|                          | drowning                    | 1   |
|                          | hemodynamic failure         | 1   |
|                          | hemorrhagic shock           | 1   |
|                          | Hepatic encephalopathy      | 1   |
|                          | Intracranial hemorrhage     | 1   |
|                          | Ischemic stroke             | 3   |
|                          | multiple organ failure      | 3   |
|                          | pulmonary embolism          | 1   |
|                          | Renal failure               | 1   |
|                          | Respiratory failure         | 2   |
|                          | sepsis                      | 19  |
|                          | sudden cardiac arrest       | 5   |
|                          | unknown                     | 5   |
| 4                        | cardiogenic shock           | 2   |
|                          | CHF exacerbation            | 2   |
|                          | Intracranial hemorrhage     | 1   |
|                          | Ischemic stroke             | 1   |
|                          | multiple organ failure      | 5   |
|                          | Respiratory failure         | 4   |
|                          | rhabdomyolysis              | 1   |
|                          | sepsis                      | 37  |
|                          | sudden cardiac arrest       | 10  |
|                          | unknown                     | 5   |
| Grand Total              |                             | 163 |
| Quartile of 2nd CRP test | Cause of death              | n   |
| 1                        | cardiogenic shock           | 1   |
|                          | Intracranial hemorrhage     | 1   |

|   |                                          |     |
|---|------------------------------------------|-----|
|   | sudden cardiac arrest                    | 1   |
|   | unknown                                  | 1   |
| 2 | advanced metastatic disease              | 1   |
|   | anoxic brain damage                      | 1   |
|   | cardiogenic shock                        | 1   |
|   | Intracranial hemorrhage                  | 1   |
|   | Ischemic stroke                          | 1   |
|   | multiple organ failure                   | 4   |
|   | Respiratory failure                      | 5   |
|   | sepsis                                   | 6   |
|   | sudden cardiac arrest                    | 5   |
|   | unknown                                  | 2   |
|   | cardiogenic shock                        | 2   |
| 3 | Congestive Heart Failure<br>exacerbation | 2   |
|   | hemodynamic failure                      | 1   |
|   | hemorrhagic shock                        | 1   |
|   | Hepatic encephalopathy                   | 1   |
|   | Intracranial hemorrhage                  | 8   |
|   | Ischemic stroke                          | 2   |
|   | multiple organ failure                   | 3   |
|   | pulmonary embolism                       | 1   |
|   | Renal failure                            | 1   |
|   | Respiratory failure                      | 4   |
|   | sepsis                                   | 18  |
|   | status epilepticus                       | 1   |
|   | sudden cardiac arrest                    | 2   |
|   | unknown                                  | 2   |
|   | cardiogenic shock                        | 2   |
| 4 | Congestive Heart Failure<br>exacerbation | 2   |
|   | drowning                                 | 1   |
|   | Intracranial hemorrhage                  | 10  |
|   | Ischemic stroke                          | 3   |
|   | multiple organ failure                   | 4   |
|   | Respiratory failure                      | 2   |
|   | rhabdomyolysis                           | 1   |
|   | sepsis                                   | 39  |
|   | sudden cardiac arrest                    | 12  |
|   | unknown                                  | 7   |
|   | Grand Total                              | 163 |
